# Supplementary material
Source: PubMed Central journal article supplement (PMC9608019)
Supplement: jama-e2217701-s005.pdf [file jama-e2217701-s005.pdf]

## **Data Sharing Statement**

### **Data**

**Data available:** Yes

**Data types:** Deidentified participant data, Data dictionary

**How to access data:** Interested parties are able to request access to data by contacting the corresponding author.

**When available:** beginning date: 08-01-2023

### **Supporting Documents**

**Document types:** None

### **Additional Information**

**Who can access the data:** Data will be made available to interested parties whose proposed use of data has approval from an ethics committee.

**Types of analyses:** Data will be made available for any research purpose as long as the research has approval from an ethics committee and EXACT Trial Steering Committee find the proposal methodologically sound. Approval from the participating emergency medical services may also be required.

**Mechanisms of data availability:** Data will be made available with approval of the EXACT steering committee with a signed data access agreement.
